# Supplementary material for: Synthetic Makaluvamine Analogs Decrease c-Kit Expression and Are Cytotoxic to Neuroendocrine Tumor Cells
Source: PubMed Central journal article supplement (PMC7663375; doi:10.3390/molecules25214940), 2020-10-26

# Synthetic makaluvamine analogs decrease c-Kit expression and are cytotoxic to neuroendocrine tumor cells

Zviadi Aburjania, Jason D. Whitt, Samuel Jang, Dwayaja H. Nadkarni, Herbert Chen, J. Bart Rose, Sadanandan E. Velu\*, Renata Jaskula-Sztul\*

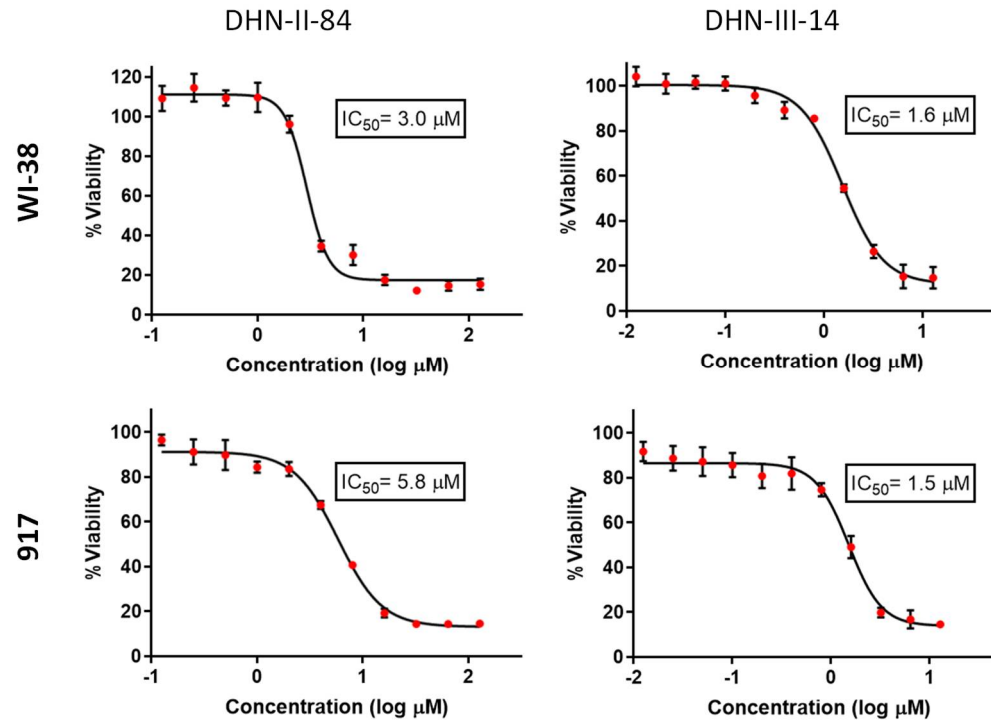

**Figure S1:** The  $\text{IC}_{50}$  values of DHN-II-84 and DHN-III-14 in non-cancerous WI-38 and 917 cell lines as determined by CellTiter-Glo assay. Experiments were performed in quadruplicate and individual data points are plotted as mean  $\pm$  SEM.

# <sup>1</sup>H-NMR of DHN-III-14 in CDCl<sub>3</sub>

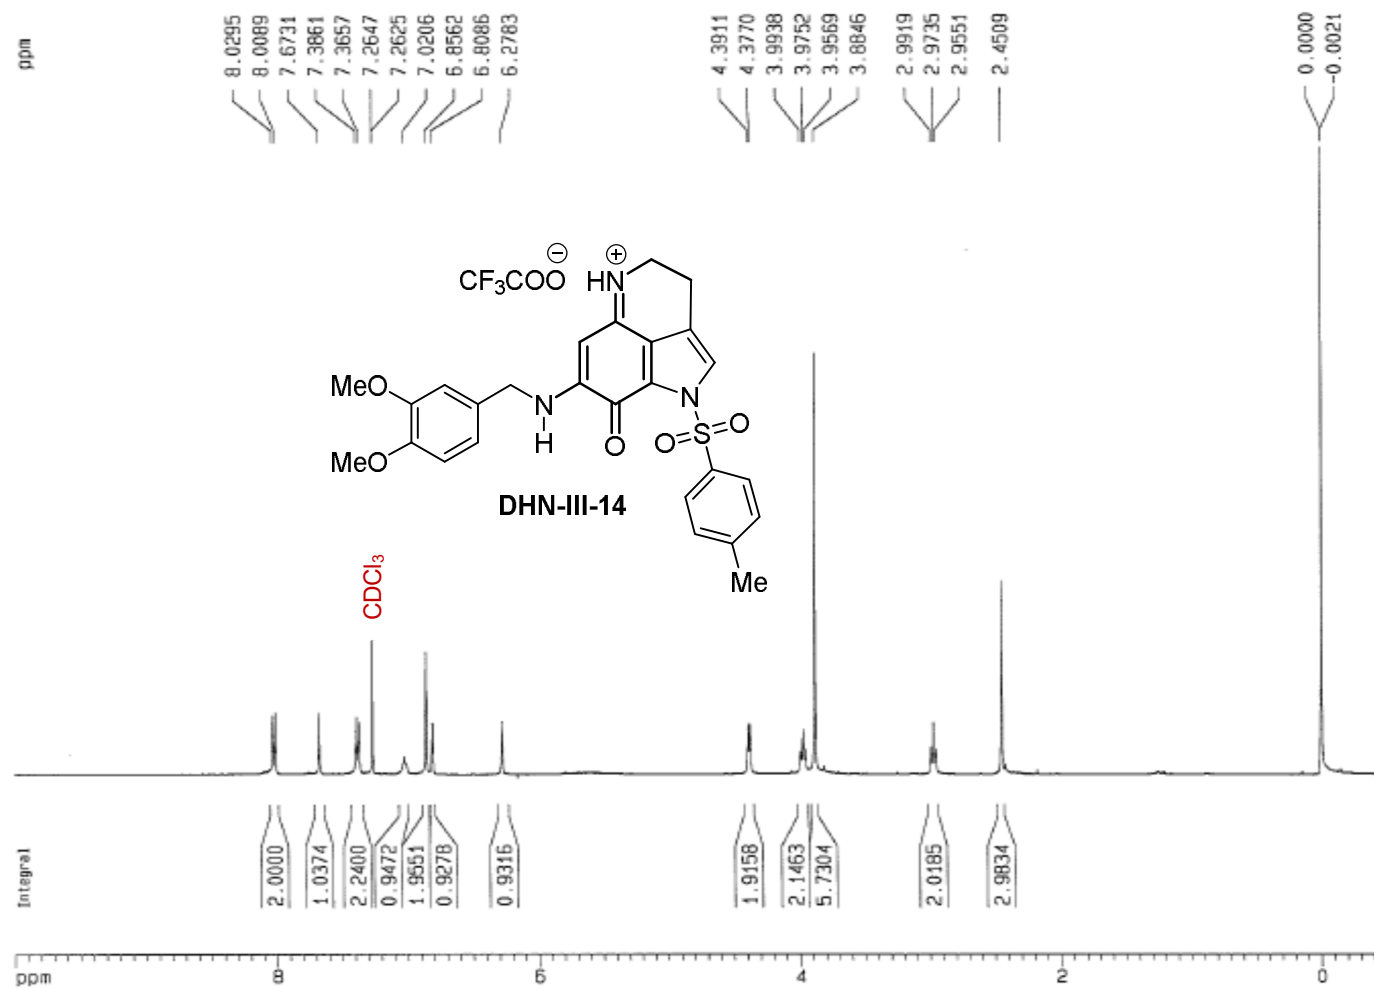

<sup>13</sup>C-NMR of DHN-III-14 in CDCl<sub>3</sub>

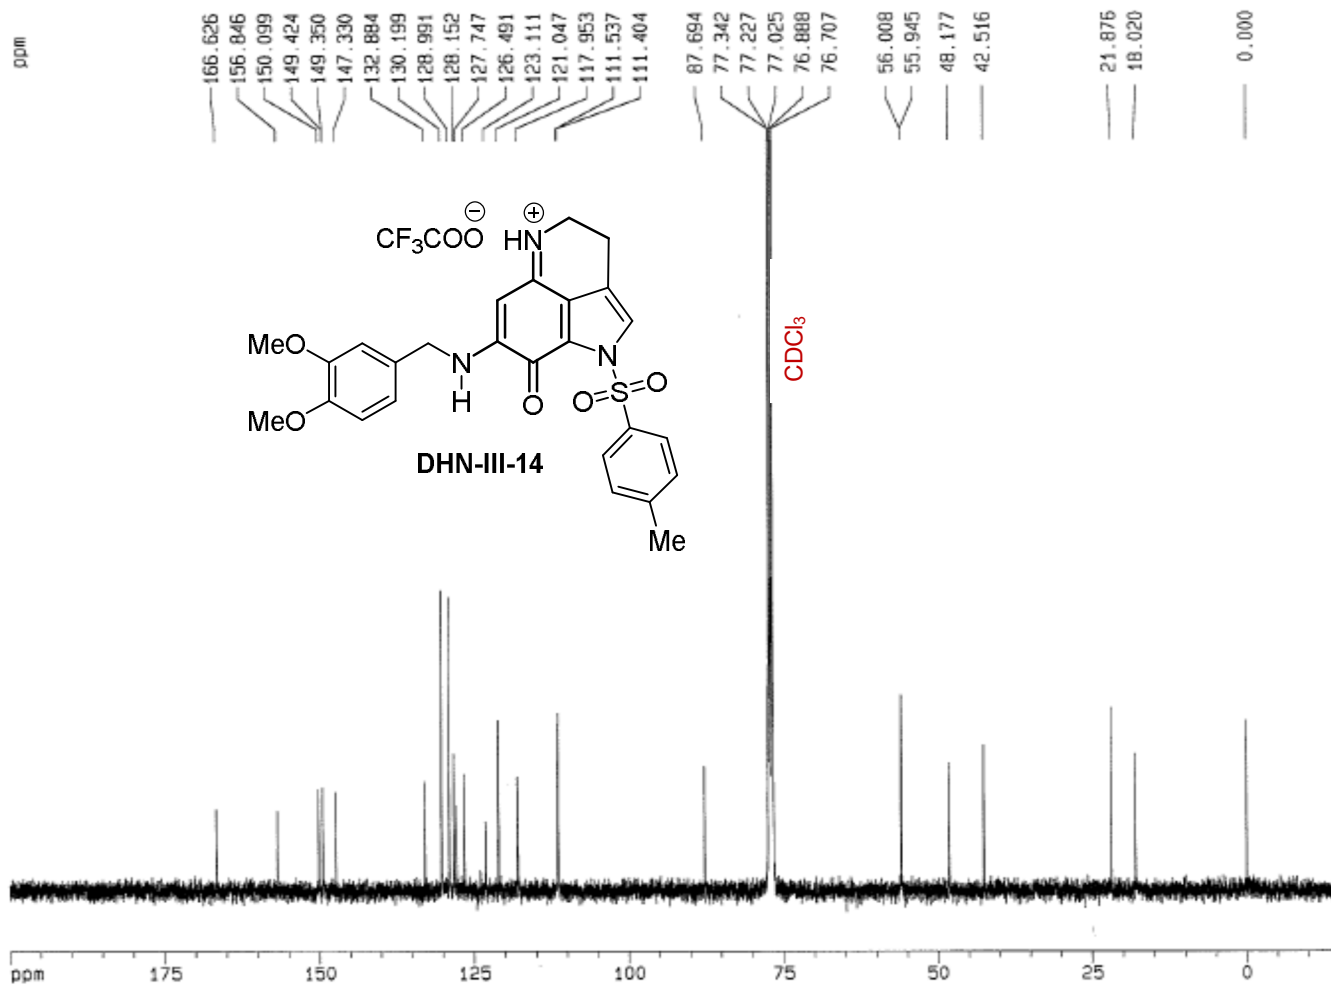

<sup>1</sup>H-NMR of DHN-II-84 in CD<sub>3</sub>OD

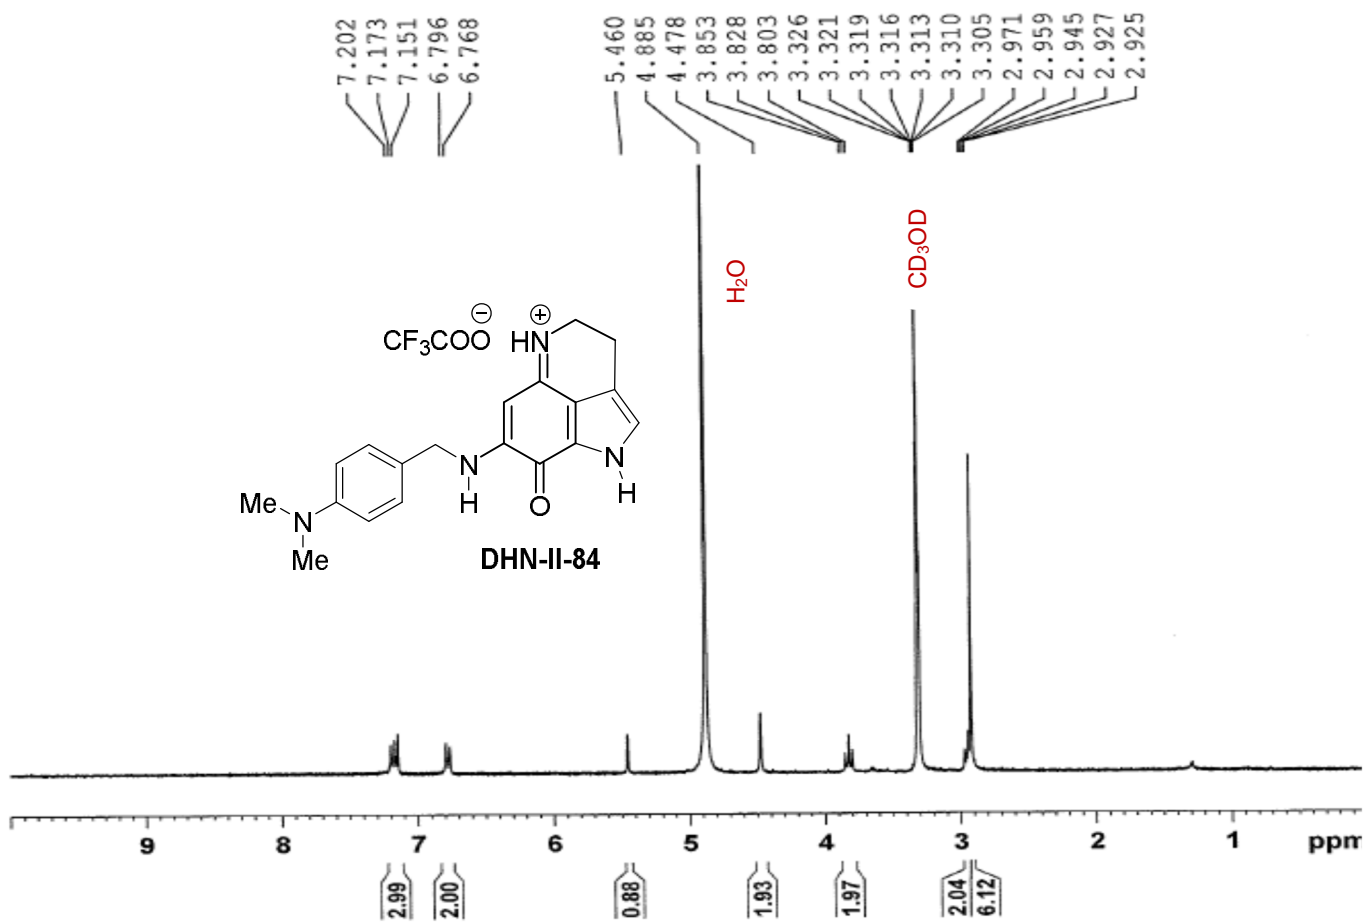

<sup>13</sup>C-NMR of DHN-II-84 in CD<sub>3</sub>OD

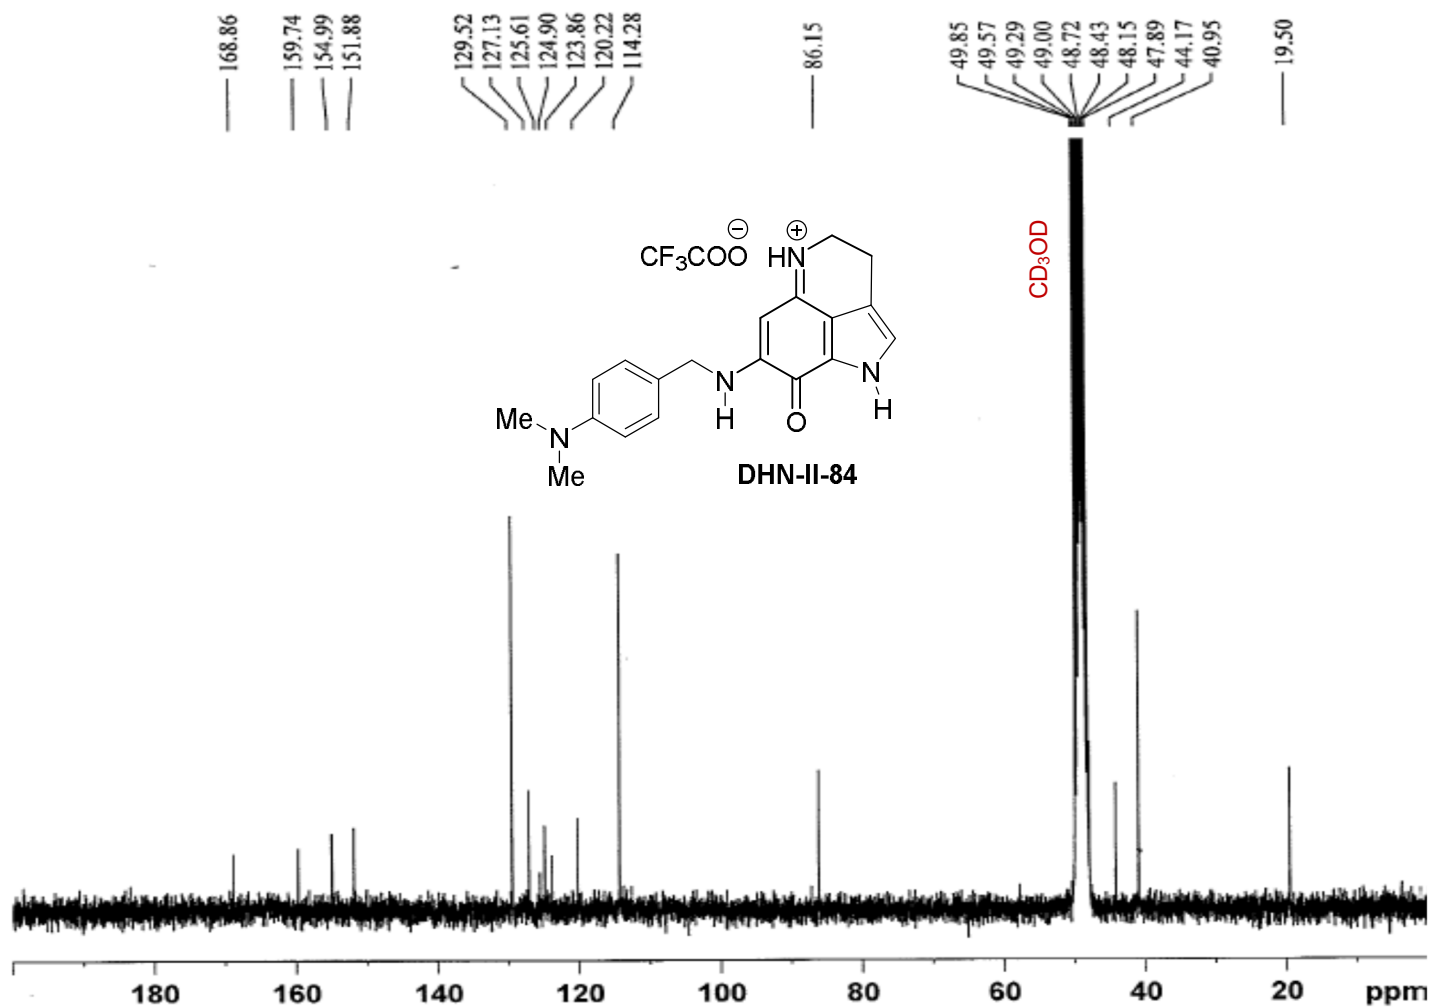

Supplement: molecules-25-04940-s001.pdf [file molecules-25-04940-s001.pdf]
